# Supplementary material for: Light extraction enhancement in organic light-emitting diodes based on localized surface plasmon and light scattering double-effect
Source: Royal Society of Chemistry journal article supplement (doi:10.1039/c3tc30197d), 2013-01-01
Supplement: c3tc30197d.pdf [file c3tc30197d.pdf]

**Supplementary Information for Light extraction enhancement in  
organic light-emitting diodes based on localized surface plasmon and  
light scattering double-effect**

Yan Gu, Dan-Dan Zhang,\* Qing-Dong Ou, Yan-Hong Deng, Jun-Jun Zhu, Liang  
Cheng, Zhuang Liu, Shuit-Tong Lee, Yan-Qing Li,\* and Jian-Xin Tang\*

*Jiangsu Key Laboratory for Carbon-Based Functional Materials and Devices,  
Institute of Functional Nano and Soft Materials (FUNSOM), Soochow University,  
Suzhou 215123, China*

In order to clarify the influence of Pt<sub>3</sub>Co ANPs on the variation of electric efficiency of the OLEDs, we also plotted the power efficiency of the device A, B and C shown in Fig S1. It is clear that the device B also behaves the highest power efficiency, then is the device A, and the device C shows the lowest value, implying that the Pt<sub>3</sub>Co ANPs can indeed improve the electric efficiency of the OLEDs, which includes high current efficiency and low operating voltage.

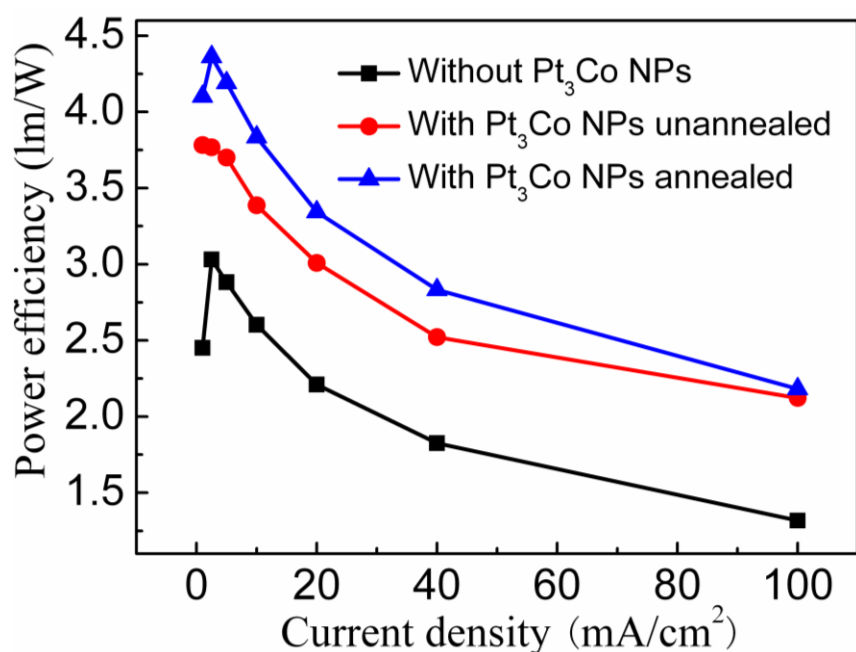

Fig S1. Power efficiency-current density characteristics of Alq<sub>3</sub> based OLEDs with unannealed Pt<sub>3</sub>Co ANPs (device A) and annealed (device B) and without Pt<sub>3</sub>Co ANPs (device C).
